# Supplementary material for: NMR spectroscopic identification of Ni(ii) species formed upon activation of (α-diimine)NiBr2 polymerization catalysts with MAO and MMAO
Source: Royal Society of Chemistry journal article supplement (doi:10.1039/c8dt00483h), 2018-01-01
Supplement: c8dt00483h1.pdf [file c8dt00483h1.pdf]

## **NMR spectroscopic identification of Ni(II) species formed upon activation of ( $\alpha$ -diimine)NiBr<sub>2</sub> polymerization catalysts with MAO and MMAO**

Igor E. Soshnikov,<sup>ab</sup> Nina V. Semikolenova,<sup>a</sup> Konstantin P. Bryliakov,<sup>ab</sup> Vladimir A. Zakharov,<sup>ab</sup> and Evgenii P. Talsi,<sup>\*ab</sup>

---

<sup>a</sup> *Bereskov Institute of Catalysis, Siberian Branch of the Russian Academy of Sciences, 630090, Novosibirsk, Russian Federation, Fax: +7 383 3308056, e-mail: [talsi@catalysis.ru](mailto:talsi@catalysis.ru)*

<sup>b</sup> *Novosibirsk State University, 630090, Novosibirsk, Russian Federation*

### **Electronic supporting information**

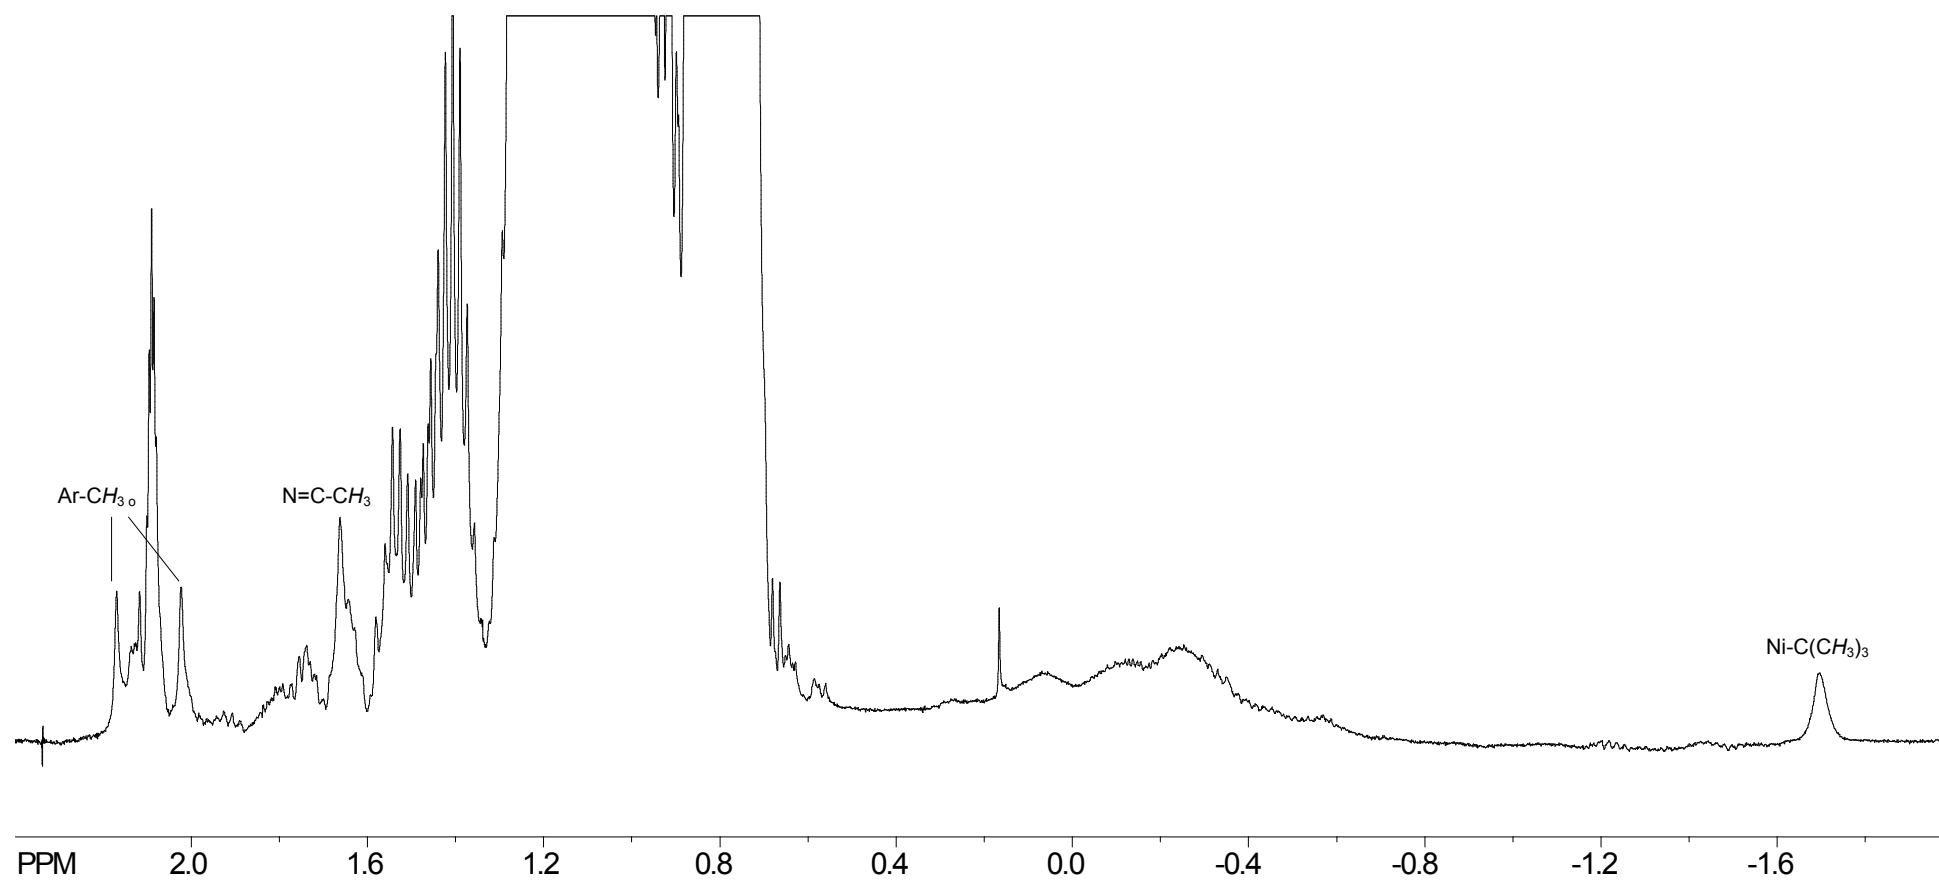

**Figure S1.**  $^1\text{H}$  NMR spectrum of the sample **1**/MMAO (toluene- $d_8$ /1,2-difluorobenzene (2:1),  $[\text{Al}]/[\text{Ni}] = 20:1$ ,  $[\text{Ni}] = 0.01$  M) recorded at  $-40$  °C.

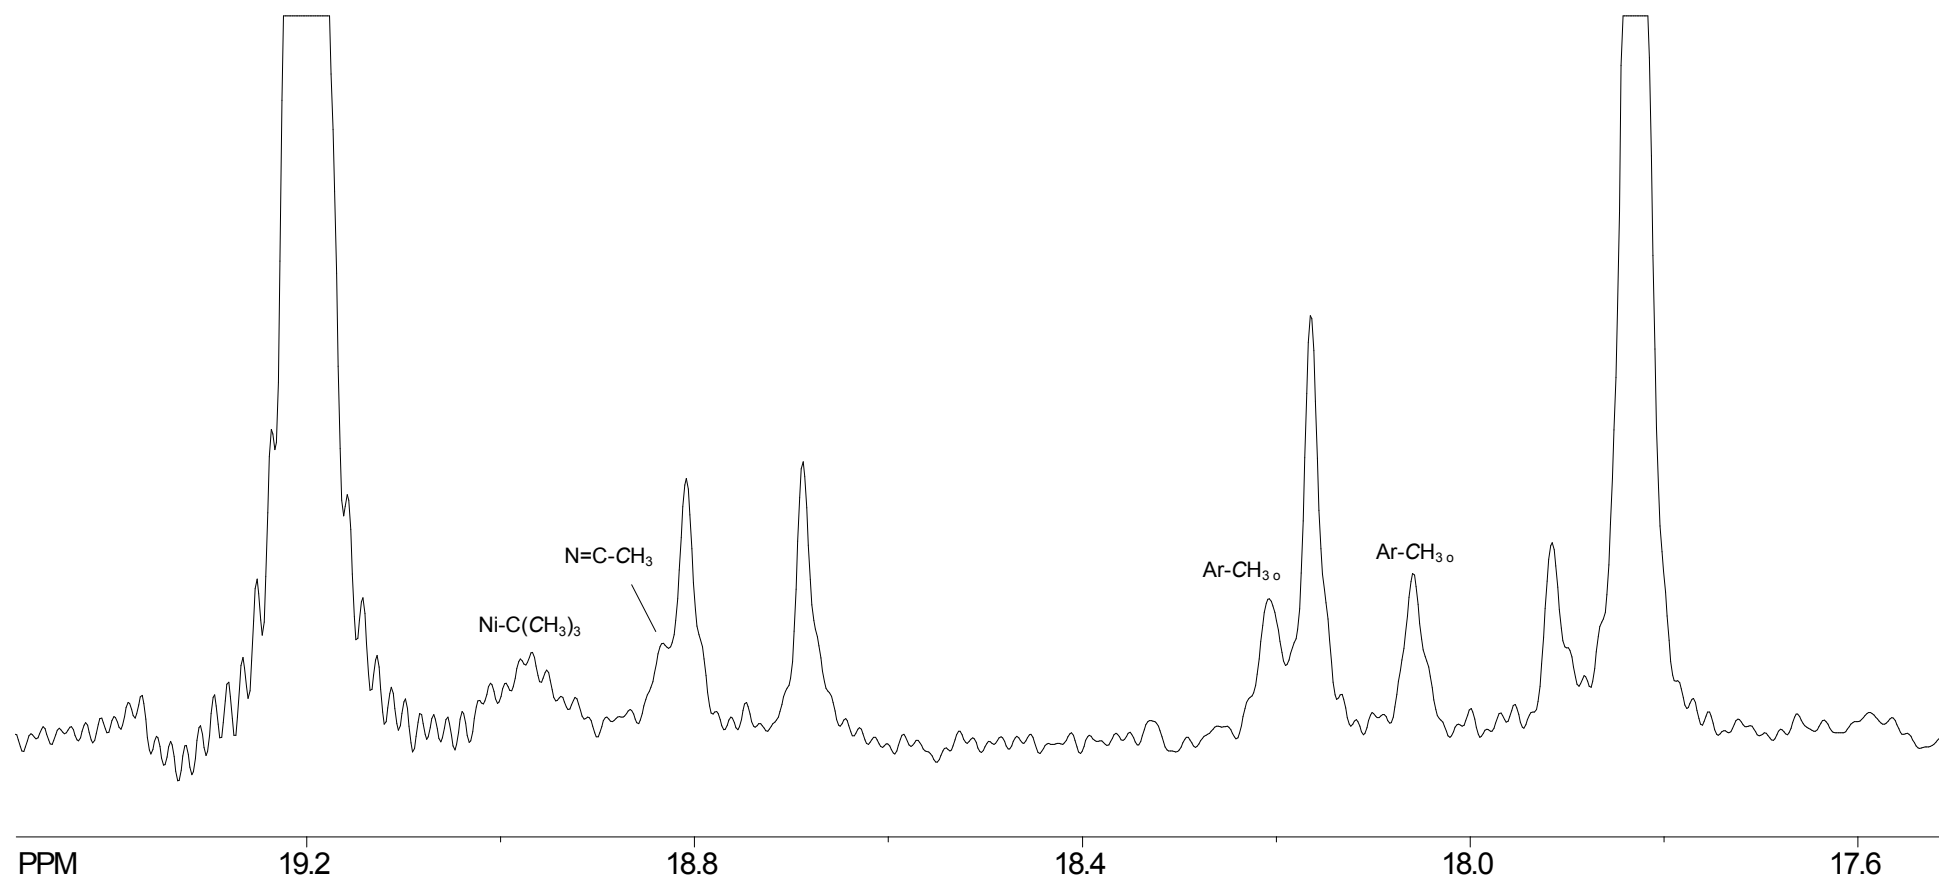

**Figure S2.** Dept45  $^{13}\text{C}$  NMR spectrum of the sample **1**/MMAO (toluene- $d_8$ /1,2-difluorobenzene (2:1),  $[\text{Al}]/[\text{Ni}] = 20:1$ ,  $[\text{Ni}] = 0.01 \text{ M}$ ) recorded at  $-40 \text{ }^\circ\text{C}$ .

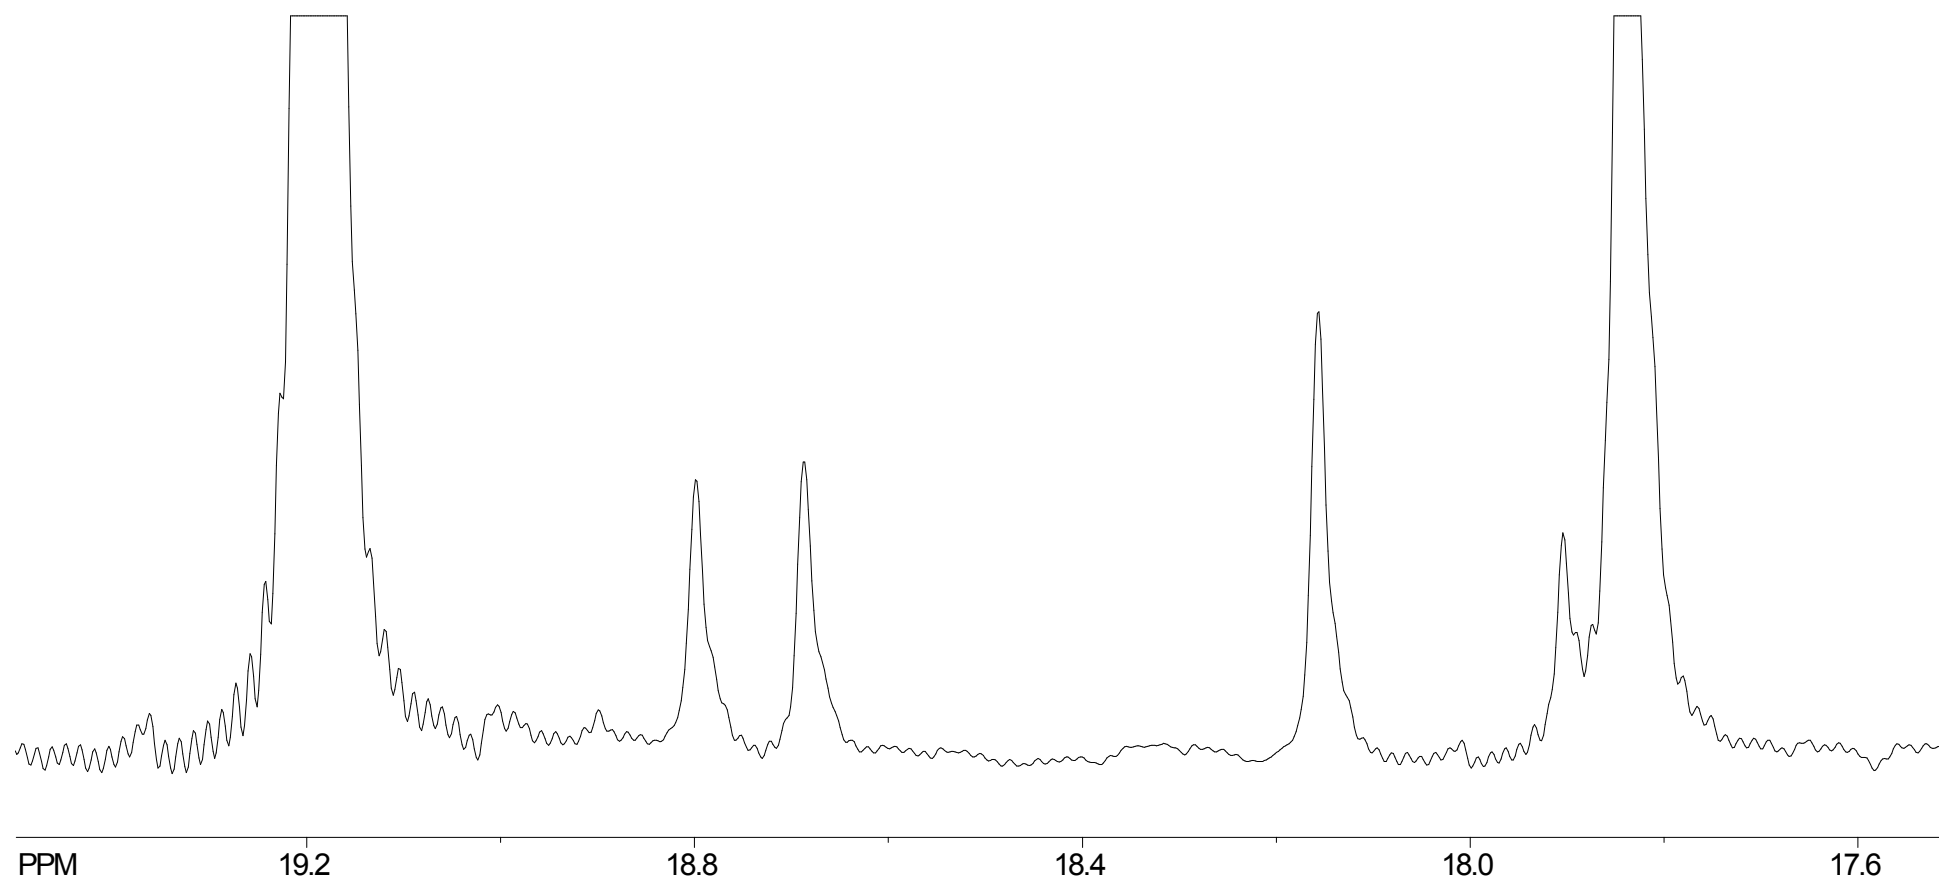

**Figure S3.** Dept45  $^{13}\text{C}$  NMR spectrum of the system **1**/MMAO (toluene- $d_8$ /1,2-difluorobenzene (2:1),  $[\text{Al}]/[\text{Ni}] = 20:1$ ,  $[\text{Ni}] = 0.01 \text{ M}$ ) recorded at  $-40 \text{ }^\circ\text{C}$  upon storing at room temperature for 1 h (resonances of **3'** disappeared).

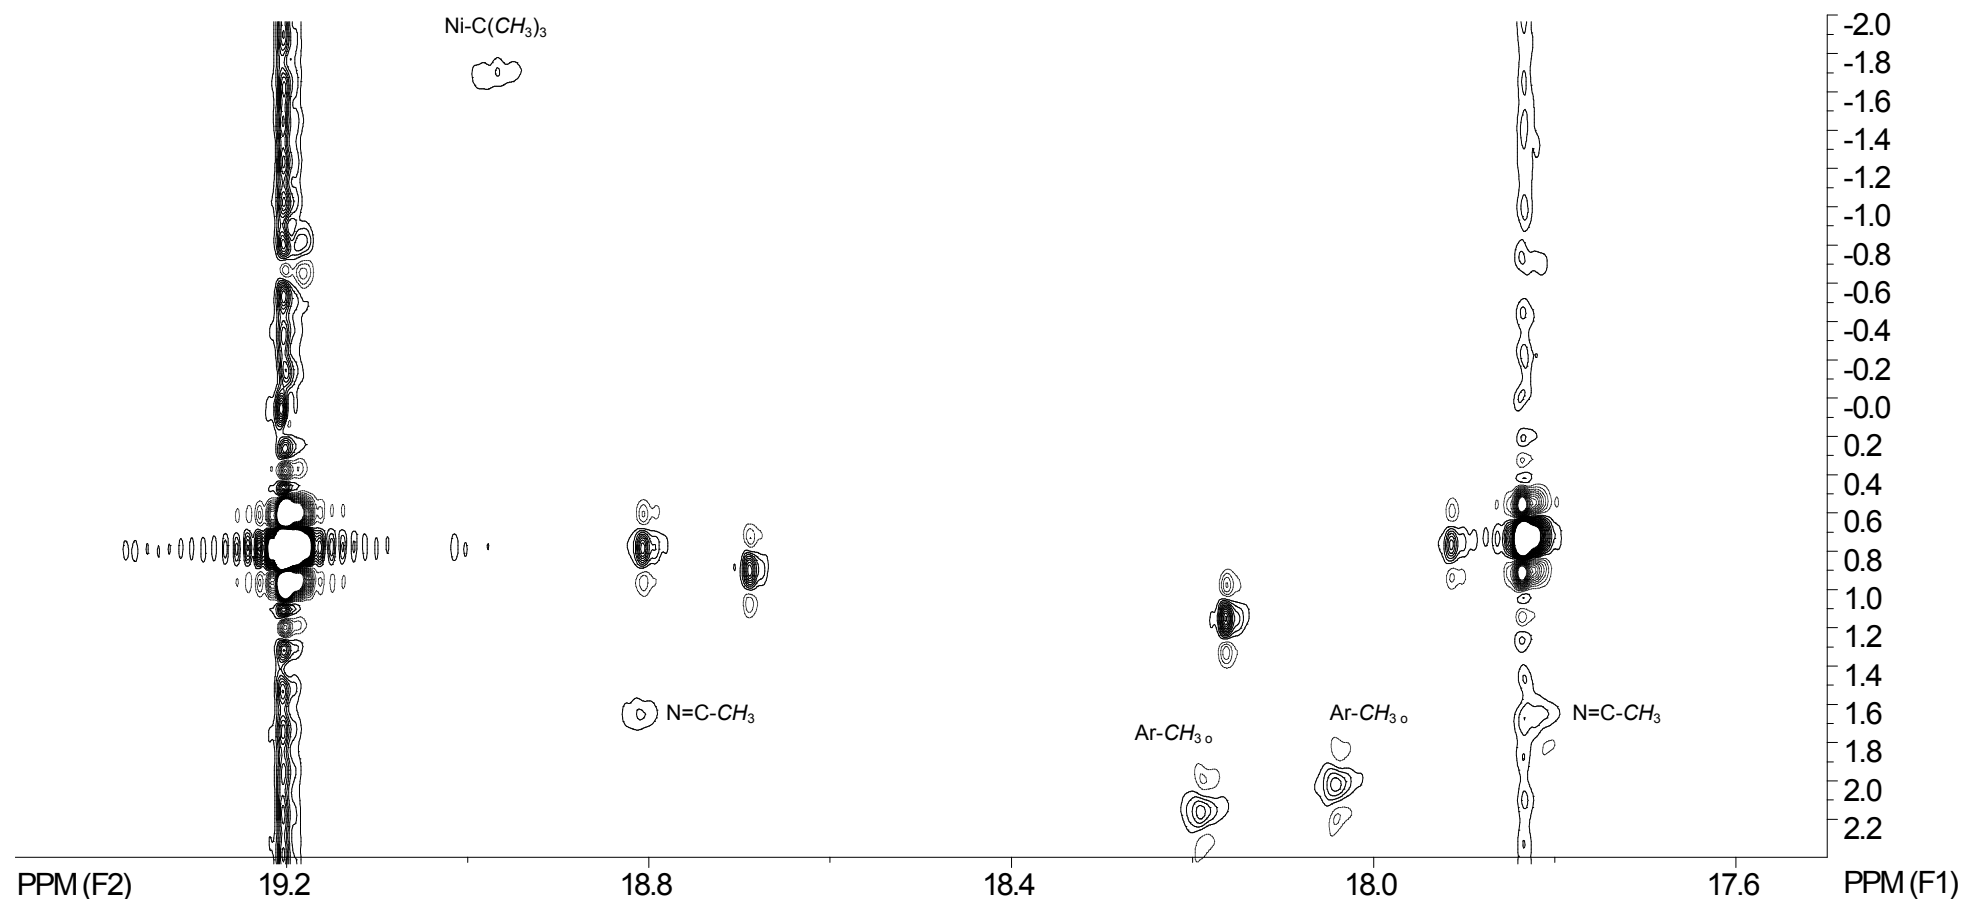

**Figure S4.**  $^1\text{H}$ ,  $^{13}\text{C}$  hzdeptbipf NMR spectrum of the sample **1**/MMAO (toluene- $d_8$ /1,2-difluorobenzene (2:1),  $[\text{Al}]/[\text{Ni}] = 20:1$ ,  $[\text{Ni}] = 0.01 \text{ M}$ ) recorded at  $-40 \text{ }^\circ\text{C}$ .
